# Supplementary material for: 785 nm femtosecond laser ablation for improved precision and reduction of interferences in Sr isotope analyses using MC-ICP-MS
Source: Royal Society of Chemistry journal article supplement (doi:10.1039/c0ja00131g), 2010-10-22
Supplement: supplementaryfigures.pdf [file supplementaryfigures.pdf]

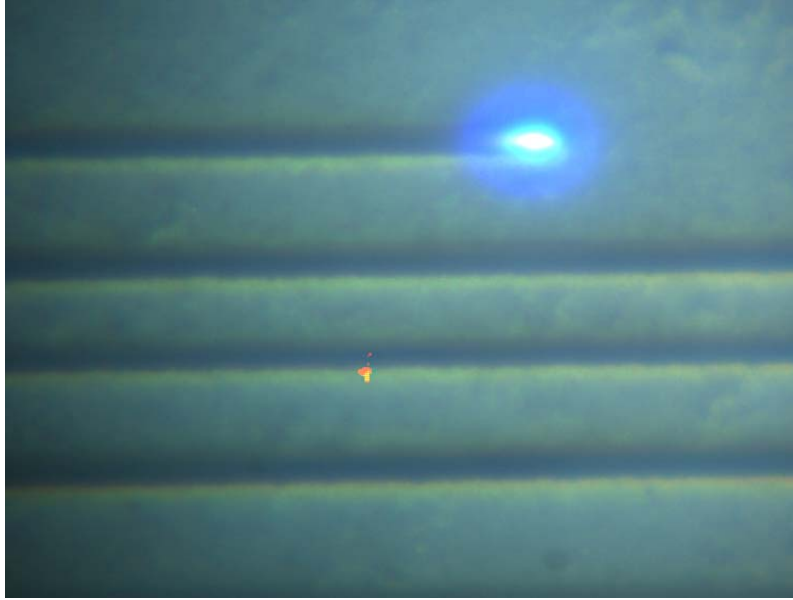

**Fig. 1** The fs laser ablation of FEBS-1 at 150 Hz repetition rate and 0.1 mJ Pulse<sup>-1</sup> energy. The raster width is 40 μm.

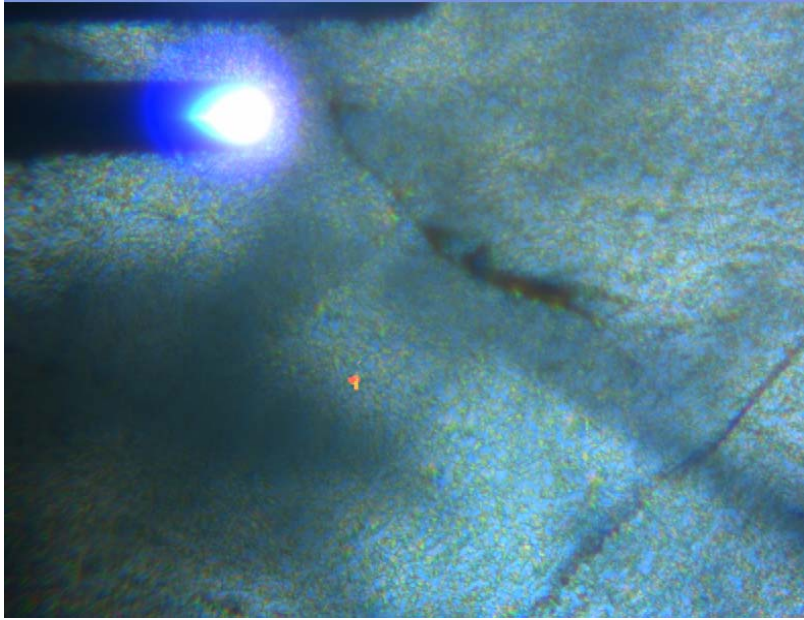

**Fig. 2 The fs laser ablation of 662 blue fluorite sample. The raster width is 110  $\mu\text{m}$ .**
