# Supplementary material for: 785 nm femtosecond laser ablation for improved precision and reduction of interferences in Sr isotope analyses using MC-ICP-MS
Source: Royal Society of Chemistry journal article supplement (doi:10.1039/c0ja00131g), 2010-10-22
Supplement: supplementarytables.pdf [file supplementarytables.pdf]

**Table 1 Results of fs LA-MC-ICP-MS Sr isotope analysis of FEBS-1**

| Energy<br>(mJ pulse <sup>-1</sup> ) | Repetition<br>Rate (Hz) | <sup>88</sup> Sr Intensity<br>(V) | <sup>85</sup> Rb Intensity<br>(V) | 84Sr/86Sr<br>Ratio | 84Sr/86Sr<br>SE | 87Sr/86Sr<br>Ratio | 87Sr/86Sr<br>SE | Raster<br>Width (um) | Fluency<br>(J cm <sup>-2</sup> ) |
|-------------------------------------|-------------------------|-----------------------------------|-----------------------------------|--------------------|-----------------|--------------------|-----------------|----------------------|----------------------------------|
| 0.1                                 | 5                       | 2.89                              | 0.00014                           | 0.056567           | 0.000009        | 0.709119           | 0.000021        | 46                   | 6.02                             |
|                                     | 10                      | 1.26                              | 0.00007                           | 0.056584           | 0.000023        | 0.709174           | 0.000036        | 48                   | 5.53                             |
|                                     | 20                      | 2.99                              | 0.00010                           | 0.056578           | 0.000010        | 0.709168           | 0.000019        | 46                   | 6.02                             |
|                                     | 50                      | 2.91                              | 0.00011                           | 0.056568           | 0.000009        | 0.709159           | 0.000019        | 42                   | 7.22                             |
|                                     | 100                     | 2.84                              | 0.00010                           | 0.056549           | 0.000010        | 0.709146           | 0.000022        | 44                   | 6.58                             |
|                                     | 150                     | 3.35                              | 0.00013                           | 0.056563           | 0.000008        | 0.709113           | 0.000022        | 40                   | 7.96                             |
|                                     | 200                     | 3.30                              | 0.00009                           | 0.056575           | 0.000009        | 0.709185           | 0.000021        | 44                   | 6.58                             |
| 0.2                                 | 5                       | 4.02                              | 0.00014                           | 0.056556           | 0.000008        | 0.709198           | 0.000017        | 54                   | 8.74                             |
|                                     | 10                      | 3.31                              | 0.00010                           | 0.056535           | 0.000009        | 0.709146           | 0.000019        | 54                   | 8.74                             |
|                                     | 20                      | 4.84                              | 0.00016                           | 0.056538           | 0.000006        | 0.709173           | 0.000014        | 56                   | 8.12                             |
|                                     | 50                      | 5.10                              | 0.00013                           | 0.056558           | 0.000006        | 0.709138           | 0.000016        | 50                   | 10.19                            |
|                                     | 100                     | 5.92                              | 0.00015                           | 0.056538           | 0.000005        | 0.709161           | 0.000014        | 56                   | 8.12                             |
|                                     | 150                     | 6.29                              | 0.00024                           | 0.056545           | 0.000004        | 0.709175           | 0.000015        | 62                   | 6.63                             |
|                                     | 200                     | 6.71                              | 0.00016                           | 0.056523           | 0.000004        | 0.709151           | 0.000015        | 60                   | 7.08                             |
| 0.3                                 | 5                       | 4.94                              | 0.00020                           | 0.056553           | 0.000007        | 0.709153           | 0.000016        | 56                   | 12.19                            |
|                                     | 10                      | 4.82                              | 0.00016                           | 0.056531           | 0.000006        | 0.709138           | 0.000016        | 62                   | 9.94                             |
|                                     | 20                      | 6.58                              | 0.00020                           | 0.056541           | 0.000005        | 0.709166           | 0.000013        | 62                   | 9.94                             |
|                                     | 50                      | 7.38                              | 0.00019                           | 0.056551           | 0.000004        | 0.709186           | 0.000012        | 58                   | 11.36                            |
|                                     | 100                     | 9.39                              | 0.00024                           | 0.056551           | 0.000004        | 0.709172           | 0.000012        | 68                   | 8.26                             |
|                                     | 150                     | 9.83                              | 0.00034                           | 0.056530           | 0.000004        | 0.709176           | 0.000012        | 66                   | 8.77                             |
|                                     | 200                     | 10.10                             | 0.00022                           | 0.056529           | 0.000003        | 0.709183           | 0.000011        | 66                   | 8.77                             |
| 0.4                                 | 5                       | 6.03                              | 0.00023                           | 0.056555           | 0.000005        | 0.709134           | 0.000017        | 54                   | 17.47                            |
|                                     | 10                      | 6.55                              | 0.00021                           | 0.056534           | 0.000005        | 0.709171           | 0.000011        | 60                   | 14.15                            |
|                                     | 20                      | 8.51                              | 0.00029                           | 0.056540           | 0.000004        | 0.709151           | 0.000011        | 66                   | 11.70                            |
|                                     | 50                      | 9.90                              | 0.00025                           | 0.056537           | 0.000003        | 0.709169           | 0.000012        | 70                   | 10.40                            |
|                                     | 100                     | 13.06                             | 0.00023                           | 0.056528           | 0.000003        | 0.709171           | 0.000010        | 74                   | 9.31                             |
|                                     | 150                     | 13.79                             | 0.00033                           | 0.056524           | 0.000002        | 0.709163           | 0.000009        | 72                   | 9.83                             |
|                                     | 200                     | 14.84                             | 0.00032                           | 0.056524           | 0.000003        | 0.709163           | 0.000009        | 70                   | 10.40                            |
| 0.5                                 | 5                       | 6.47                              | 0.00025                           | 0.056550           | 0.000004        | 0.709149           | 0.000015        | 72                   | 12.29                            |
|                                     | 10                      | 8.13                              | 0.00028                           | 0.056532           | 0.000004        | 0.709146           | 0.000012        | 76                   | 11.03                            |
|                                     | 20                      | 10.34                             | 0.00026                           | 0.056533           | 0.000003        | 0.709151           | 0.000011        | 74                   | 11.63                            |
|                                     | 50                      | 13.45                             | 0.00029                           | 0.056522           | 0.000003        | 0.709168           | 0.000011        | 78                   | 10.47                            |
|                                     | 100                     | 16.61                             | 0.00037                           | 0.056521           | 0.000002        | 0.709169           | 0.000009        | 78                   | 10.47                            |
|                                     | 150                     | 17.81                             | 0.00033                           | 0.056519           | 0.000002        | 0.709164           | 0.000009        | 82                   | 9.47                             |
|                                     | 200                     | 18.80                             | 0.00037                           | 0.056512           | 0.000002        | 0.709168           | 0.000009        | 84                   | 9.03                             |
| 0.6                                 | 5                       | 6.95                              | 0.00032                           | 0.056554           | 0.000005        | 0.709168           | 0.000013        | 90                   | 9.44                             |
|                                     | 10                      | 9.55                              | 0.00032                           | 0.056534           | 0.000004        | 0.709159           | 0.000011        | 88                   | 9.87                             |
|                                     | 20                      | 11.79                             | 0.00034                           | 0.056528           | 0.000003        | 0.709170           | 0.000010        | 80                   | 11.94                            |
|                                     | 50                      | 16.72                             | 0.00038                           | 0.056528           | 0.000002        | 0.709166           | 0.000010        | 86                   | 10.33                            |
|                                     | 100                     | 20.39                             | 0.00048                           | 0.056520           | 0.000002        | 0.709165           | 0.000009        | 96                   | 8.29                             |
|                                     | 150                     | 21.10                             | 0.00036                           | 0.056517           | 0.000002        | 0.709172           | 0.000008        | 86                   | 10.33                            |
|                                     | 200                     | 21.80                             | 0.00043                           | 0.056511           | 0.000002        | 0.709167           | 0.000008        | 92                   | 9.03                             |

Data was normalized to EN-1, a reference material prepared by the USGS from the shell of a modern giant clam from Eniwetok Atoll, described by McArthur et al., 2006.

**Table 2 Results of solution MC-ICP-MS Sr isotope analysis of FEBS-1**

| <sup>88</sup> Sr Intensity<br>(V) | <sup>85</sup> Rb Intensity<br>(V) | <sup>84</sup> Sr/ <sup>86</sup> Sr<br>Ratio | <sup>84</sup> Sr/ <sup>86</sup> Sr<br>SE | <sup>87</sup> Sr/ <sup>86</sup> Sr<br>Ratio | <sup>87</sup> Sr/ <sup>86</sup> Sr<br>SE |
|-----------------------------------|-----------------------------------|---------------------------------------------|------------------------------------------|---------------------------------------------|------------------------------------------|
| 9.34                              | 0.000022                          | 0.056445                                    | 0.000011                                 | 0.709190                                    | 0.000003                                 |
| 8.85                              | 0.000017                          | 0.056466                                    | 0.000009                                 | 0.709201                                    | 0.000004                                 |
| 7.74                              | 0.000013                          | 0.056467                                    | 0.000009                                 | 0.709194                                    | 0.000003                                 |
| 7.27                              | 0.000003                          | 0.056418                                    | 0.000011                                 | 0.709199                                    | 0.000003                                 |
| 8.76                              | 0.000007                          | 0.056427                                    | 0.000010                                 | 0.709181                                    | 0.000003                                 |
| 9.16                              | 0.000018                          | 0.056419                                    | 0.000013                                 | 0.709199                                    | 0.000003                                 |
| 9.02                              | 0.000015                          | 0.056421                                    | 0.000011                                 | 0.709198                                    | 0.000003                                 |
| 12.33                             | 0.000013                          | 0.056441                                    | 0.000010                                 | 0.709206                                    | 0.000003                                 |
| 9.99                              | 0.000010                          | 0.056475                                    | 0.000008                                 | 0.709207                                    | 0.000003                                 |
| 8.83                              | 0.000027                          | 0.056440                                    | 0.000011                                 | 0.709194                                    | 0.000003                                 |
| 9.69                              | 0.000025                          | 0.056474                                    | 0.000012                                 | 0.709193                                    | 0.000003                                 |
| 9.92                              | 0.000015                          | 0.056476                                    | 0.000012                                 | 0.709198                                    | 0.000003                                 |
| 8.25                              | 0.000015                          | 0.056486                                    | 0.000010                                 | 0.709198                                    | 0.000003                                 |
| 8.83                              | 0.000011                          | 0.056457                                    | 0.000009                                 | 0.709192                                    | 0.000003                                 |
| 11.34                             | 0.000025                          | 0.056444                                    | 0.000006                                 | 0.709194                                    | 0.000003                                 |

Data was normalized to EN-1, a reference material prepared by the USGS from the shell of a modern giant clam from Eniwetok Atoll, described by McArthur et al., 2006.
